# Supplementary material for: Calculation of salt-dependent free energy of binding of β-lactoglobulin homodimer formation and mechanism of dimer formation using molecular dynamics simulation and three-dimensional reference interaction site model (3D-RISM): diffuse salt ions and non-polar interactions between the monomers favor the dimer formation
Source: Royal Society of Chemistry journal article supplement (doi:10.1039/c9cp05578a), 2019-12-23
Supplement: c9cp05578a1.pdf [file c9cp05578a1.pdf]

## Supplementary Information

**Calculation of salt dependent free energy of binding of  $\beta$ -lactoglobulin homodimer formation and mechanism of dimer formation using molecular dynamics simulation and Three-dimensional Reference Interaction Site Model (3D-RISM): Diffuse salt ions and non-polar interaction between the monomers favour the dimer formation**

Rakesh Srivastava\*, Mausumi Chattopadhyaya\*\* , Pradipta Bandyopadhyay\*+

\*School of Computational and Integrative Sciences, Jawaharlal Nehru University, New Delhi, India

\*\* Amity Institute of Applied Sciences, Sector 125, Amity University, Noida, India

+ Corresponding Author (Email: [praban07@gmail.com](mailto:praban07@gmail.com))

## Contents:

1. Figure S1: (a)-(b): Root mean square deviation (RMSD) of  $\beta$ -lactoglobulin dimer.
2. Figure S2: (a)-(b): Root mean square fluctuation (RMSF) of  $\beta$ -lactoglobulin dimer.
3. Figure S3: (a) Total H-bond count between D33 of one monomer and R40 of other monomer (b) Total H-bond count between D33 of one monomer and A34 of other monomer (c) Total H-bond count between H146 of one monomer and S150 of other monomer lying at the  $\beta$ -I-strands, at different salt concentrations.
4. Figure S4: Salt-bridge distance between (a) D33 of one monomer and R40 of other monomer, both present in the AB loop region (b) E134 of one monomer and K141 of other monomer both present in the interface helix region, during 100ns simulation.
5. Figure S5: Pair-correlation function of  $\text{Cl}^-$  from the center of charged atoms of six residues at the protein interface.
6. Fig S6: Variation of coordination number  $N(r)$  of  $\text{Cl}^-$  ions from the center of the protein at 1.00M NaCl.
7. Table S1: The surface area of monomers and dimer from molecular dynamics simulation.
8. Table S2: A comparative study of standard deviations in  $\Delta\Delta A$  with number of frames for  $\beta$ -lactoglobulin dimer.

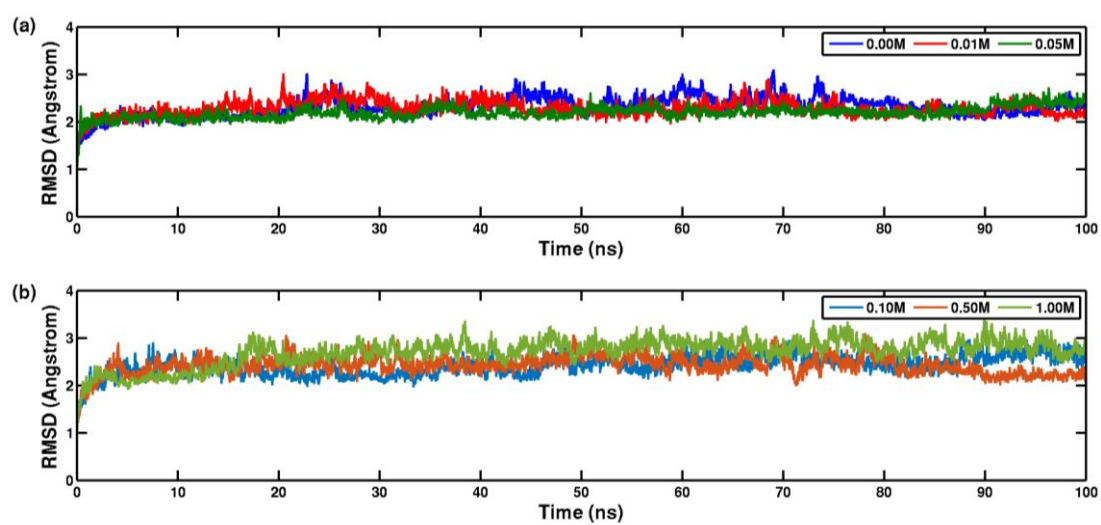

**Figure S1.** Root mean square deviation (RMSD) of  $\beta$ -lactoglobulin dimer (a) for 0.0, 0.01, 0.05 and (b) 0.10, 0.50 and 1.00M concentration of NaCl.

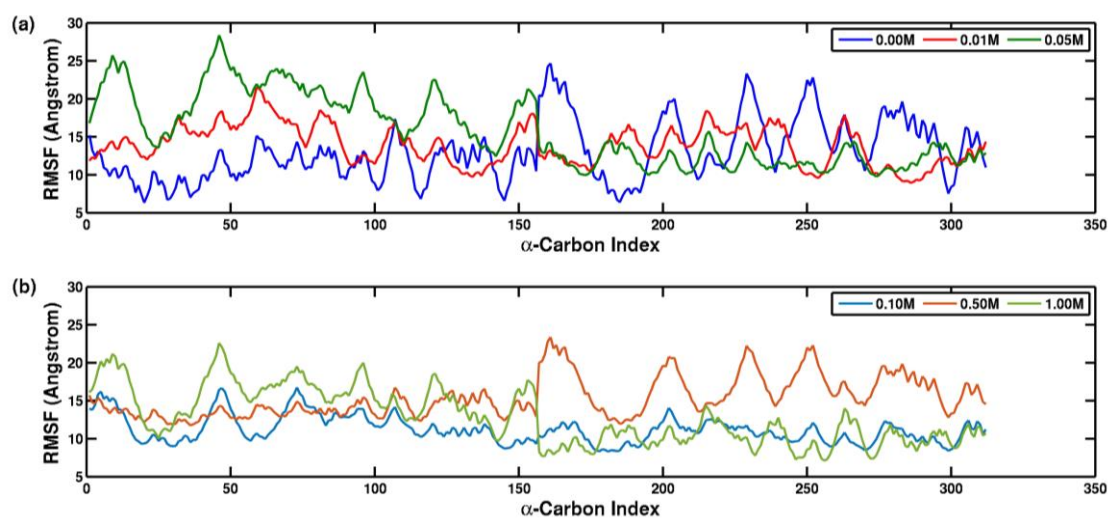

**Figure S2.** Root mean square fluctuation (RMSF) of  $\beta$ -lactoglobulin dimer (a) for 0.0, 0.01, 0.05 and (b) 0.10, 0.50 and 1.00M concentration of NaCl.

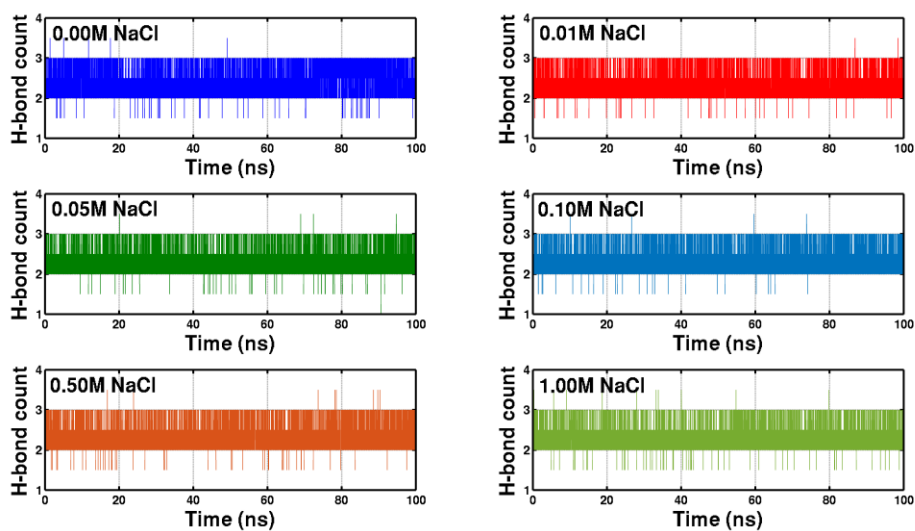

**Figure S3: (a)** Total H-bond count between D33 of one monomer and R40 of other monomer.

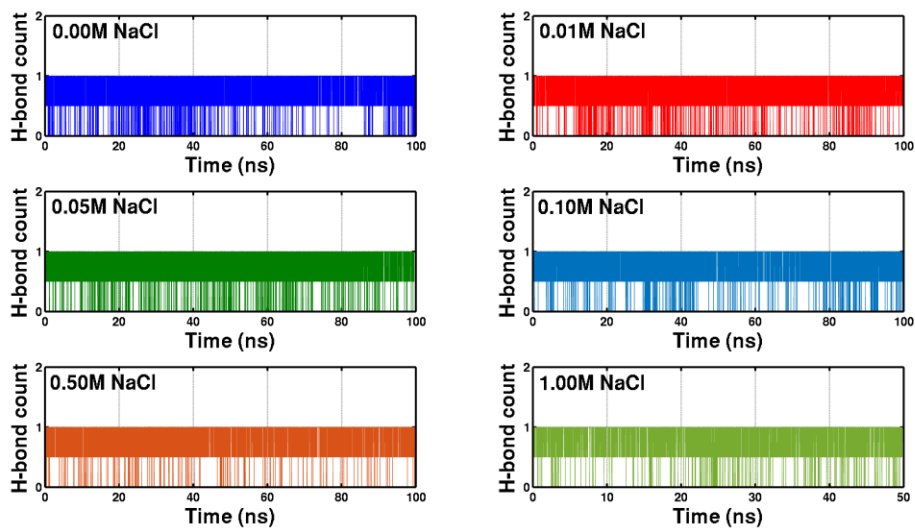

**Figure S3: (b)** Total H-bond count between D33 of one monomer and A34 of the other monomer.

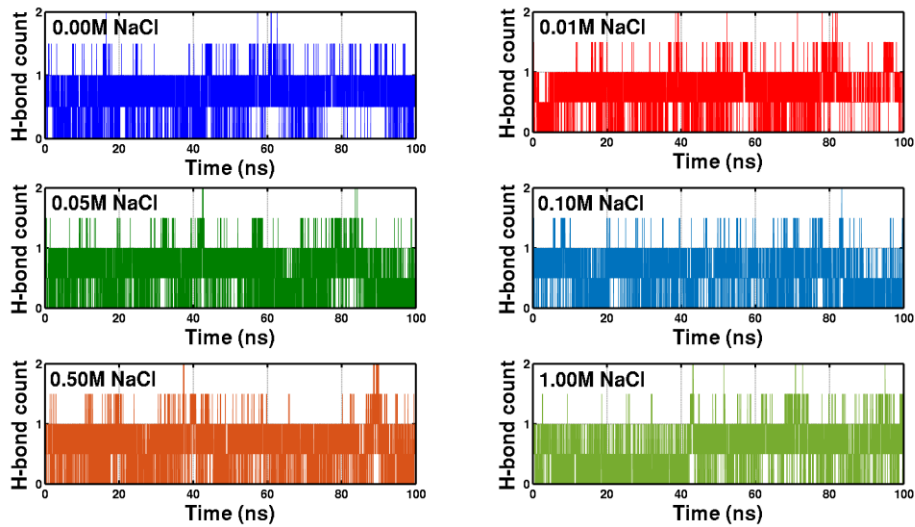

**Figure S3: (c)** Total H-bond count between H146 of one monomer and S150 of other monomer lying at the  $\beta$ -I-strands, at different salt concentrations.

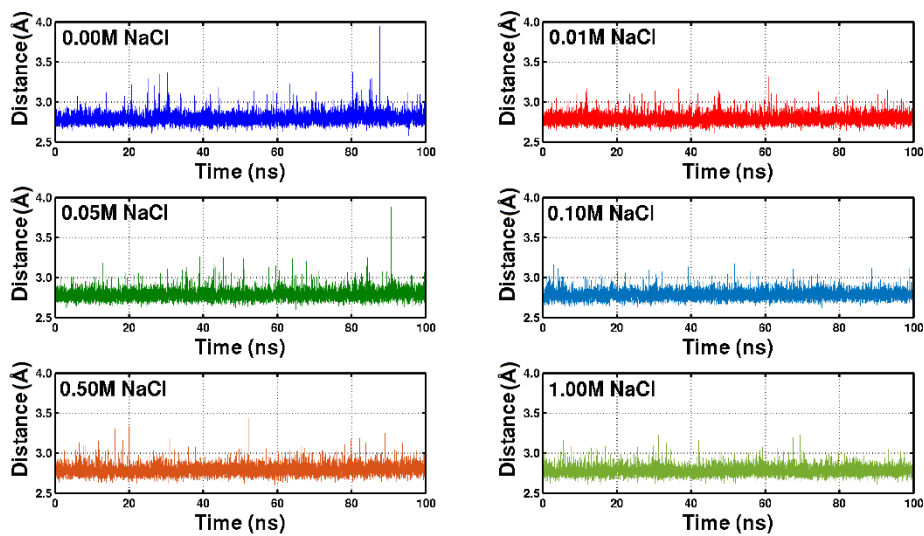

**Figure S4: (a)** Salt-bridge distance between D33 of one monomer and R40 of other monomer, both present in the AB loop region.

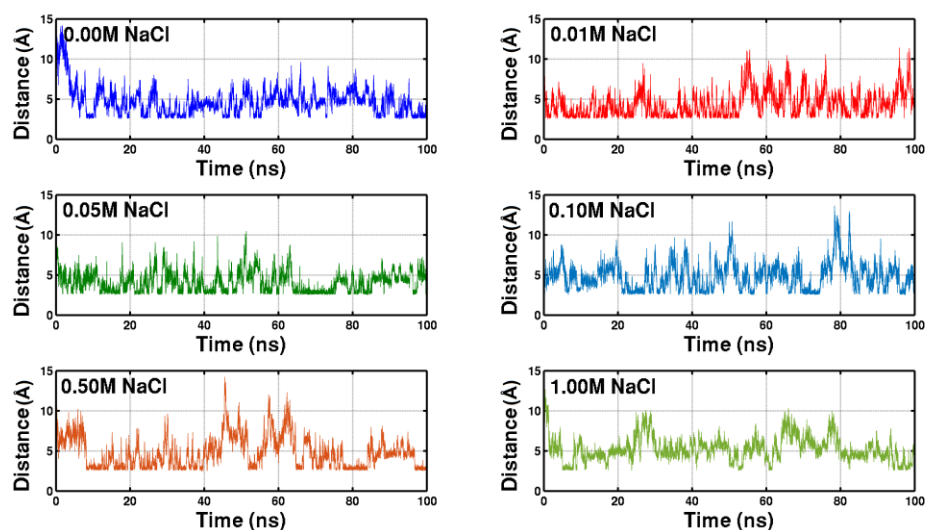

**Figure S4: (b)** Salt-bridge distance between E134 of one monomer and K141 of other monomer both present in the interface helix region, during 100ns simulation.

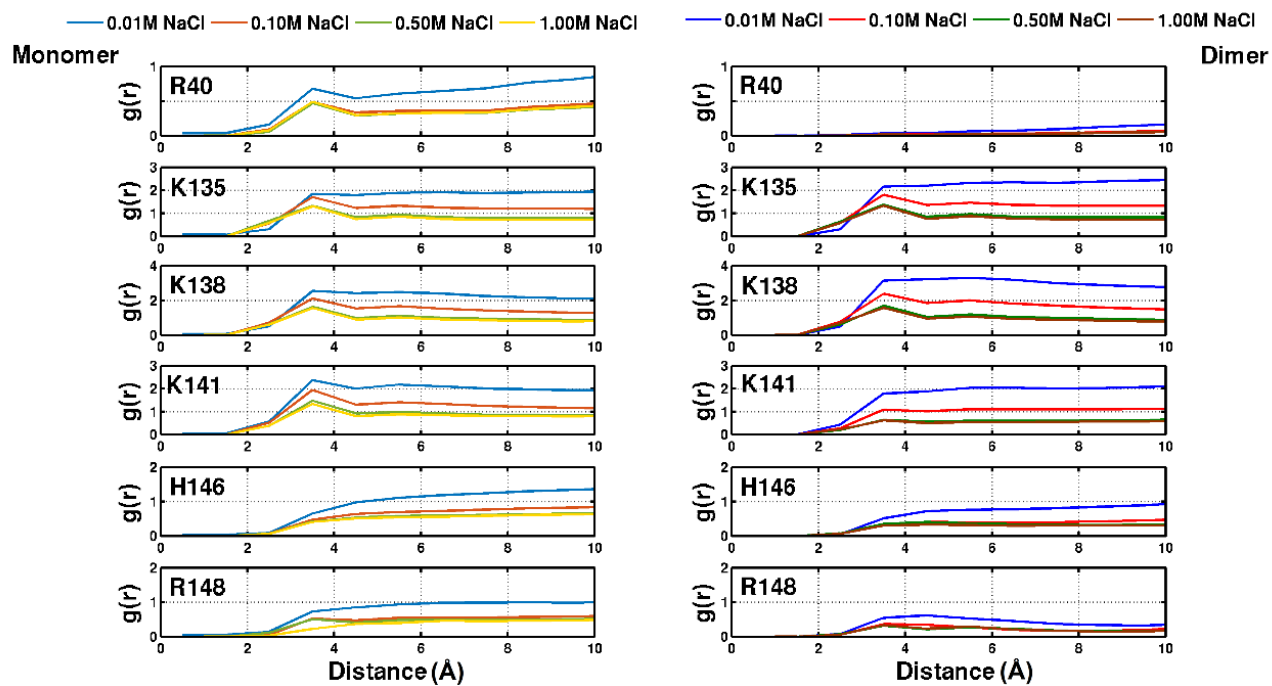

**Figure S5:** Pair correlation function between  $\text{Cl}^-$  ion and the center of the charged atom of the residues concerned.



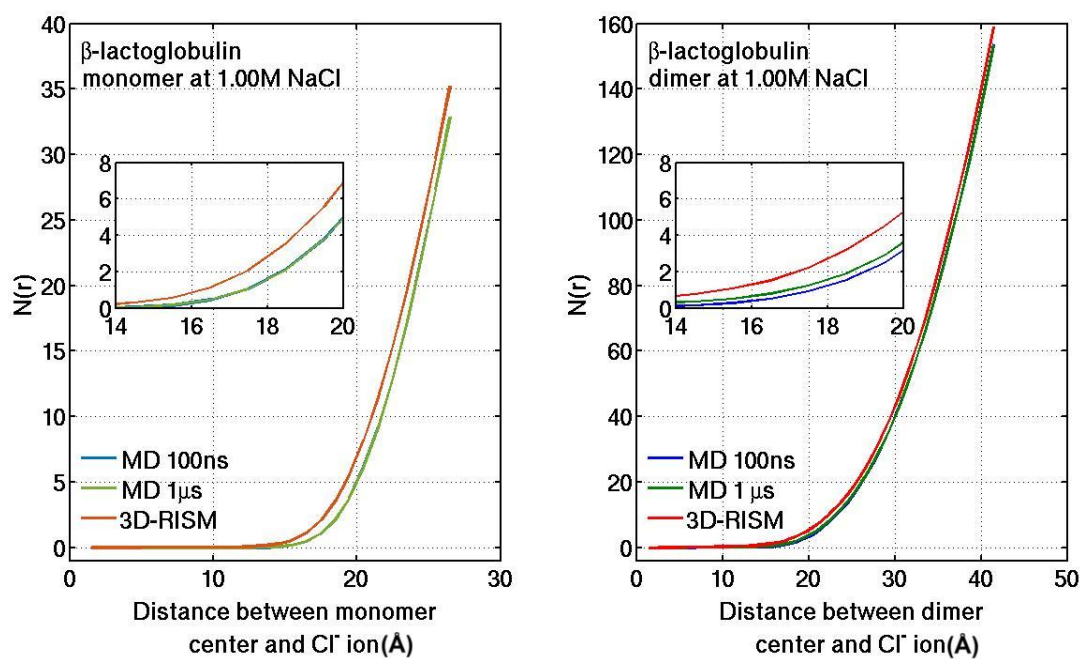

**Fig S6:** Variation of coordination number;  $N(r)$  of  $\text{Cl}^-$  ions from the center of the protein at  $1.00\text{M}$  NaCl. For the monomer, there is essentially no difference between MD run of 100ns and 1 microsecond.

**Table S1:** The surface area of monomers and dimer obtained from MD simulation

| NaCl Concentration | SASA monomer1<br>(Å <sup>2</sup> ) | SASA monomer1<br>(Å <sup>2</sup> ) | SASA dimer (Å <sup>2</sup> ) |
|--------------------|------------------------------------|------------------------------------|------------------------------|
| 0.00M              | 7826.84 ± 192.32                   | 7692.25 ± 191.78                   | 14448.7 ± 248.79             |
| 0.01M              | 7998.94 ± 198.52                   | 7653.86 ± 202.14                   | 14468.5 ± 358.11             |
| 0.05M              | 7858.82 ± 204.57                   | 7618.01 ± 206.34                   | 14261.7 ± 246.99             |
| 0.10M              | 7699.56 ± 218.60                   | 7727.83 ± 209.72                   | 14447.4 ± 247.47             |
| 0.50M              | 7973.66 ± 216.73                   | 7589.46 ± 199.44                   | 14449.7 ± 288.36             |
| 1.00M              | 7682.56 ± 209.75                   | 7578.93 ± 193.41                   | 14706.5 ± 226.58             |

**Table S2:** A comparative study of standard deviations in relative binding free energy ( $\Delta\Delta A$ ) (in kcal/mol) with the number of frames for  $\beta$ -lactoglobulin dimer.

| Concentration<br>of NaCl (in M) | $\Delta\Delta A$ (for T1 <sub>c</sub> ) for<br>25 frames | $\Delta\Delta A$ (for T1 <sub>c</sub> ) for<br>50 frames |
|---------------------------------|----------------------------------------------------------|----------------------------------------------------------|
| 0.01                            | -8.11 ± 7.04                                             | -8.76 ± 6.25                                             |
| 0.05                            | -11.53 ± 8.29                                            | -12.70 ± 8.11                                            |
| 0.10                            | -17.06 ± 7.28                                            | -16.45 ± 7.62                                            |
| 0.50                            | -12.78 ± 8.34                                            | -12.18 ± 8.17                                            |
| 1.00                            | -8.47 ± 8.28                                             | -9.75 ± 7.87                                             |
